# Supplementary material for: Realizing Sustainable Development of Yellow River Basin by Horizontal Eco-Compensation Based on Integrated Water Rights (IWRs) Transactions
Source: MDPI journal article supplement (doi:10.3390/w14172646), 2022-08-27
Supplement: s1 [file s1]

**Table S1 Database**

| Type                | Scale     | Source and description                                                                                                                                                                                                                                                                                                                                                                                                                 |
|---------------------|-----------|----------------------------------------------------------------------------------------------------------------------------------------------------------------------------------------------------------------------------------------------------------------------------------------------------------------------------------------------------------------------------------------------------------------------------------------|
| DEM                 | 90 m      | Resources and Environment Science Data Centre, CAS<br>( <a href="https://www.resdc.cn/Default.aspx">https://www.resdc.cn/Default.aspx</a> )                                                                                                                                                                                                                                                                                            |
| Soil                | 1:1000000 | National Cryosphere Desert Data Centre ( <a href="http://www.ncdc.ac.cn">www.ncdc.ac.cn</a> )<br>Harmonized World Soil Database (HWSD version 1.1)<br>Some soil attribute parameters are calculated by SPAW (a soil water characteristic model developed by Washington State University)                                                                                                                                               |
| Land use            | 1 km      | Resources and Environment Science Data Centre, CAS<br>( <a href="https://www.resdc.cn/Default.aspx">https://www.resdc.cn/Default.aspx</a> )<br>It is based on Landsat TM image of American Landsat satellite; it is generated by artificial visual interpretation. The land use types include 6 first-class types and 25 second-class types, including woodland, grassland, water, cultivated land, construction land and unused land. |
| Meteorological data | Daily     | China Meteorological Data Service Centre ( <a href="http://data.cma.cn">http://data.cma.cn</a> )<br>Daily data of China's surface climate from 2000 to 2019 (V3.0) and from 149 meteorological stations, mainly including 8 types of data: PRS, TEM, RHU, PRE, EVP, WIN, GST.                                                                                                                                                          |
| Hydrological data   | Monthly   | Monthly flow of 6 hydrological stations in 2009-2019<br>(Tangnaihai, Lanzhou, Shizuishan, Toudaoguai, Sanmenxia)                                                                                                                                                                                                                                                                                                                       |

**Table S2 Parameters of four large reservoirs in Yellow River basin**

| Name and Unit                                                                                                            | Parameters | Longyangxia | Liujiaxia | Wanjiashai | Xiaolangdi |
|--------------------------------------------------------------------------------------------------------------------------|------------|-------------|-----------|------------|------------|
| Number                                                                                                                   | OID        | 1           | 2         | 3          | 5          |
| Sub-basin                                                                                                                | SUBBASIN   | 47          | 29        | 11         | 39         |
| Starting operation time of reservoir (month)                                                                             | MORES      | 0           | 0         | 0          | 0          |
| Starting operation time of reservoir (years)                                                                             | IYRES      | 0           | 0         | 0          | 0          |
| Water surface area (during emergency flood discharge)<br>(ha)                                                            | RES_ESA    | 38000       | 13000     | 2811       | 27200      |
| Storage capacity (during emergency flood discharge)<br>(10 <sup>4</sup> m <sup>3</sup> )                                 | RES_EVOL   | 2470000     | 570000    | 89600      | 1265000    |
| Water surface area (during normal flood discharge) (ha)                                                                  | RES_PSA    | 33500       | 10500     | 2500       | 24200      |
| Storage capacity (during normal flood discharge) (10 <sup>4</sup> m <sup>3</sup> )                                       | RES_PVOL   | 2170000     | 450000    | 80000      | 1160000    |
| Initial water quantity of reservoir (water quantity at the<br>beginning of simulation) (10 <sup>4</sup> m <sup>3</sup> ) | RES_VOL    | 1994000     | 298500    | 33900      | 782800     |
| Average daily outflow from the spillway (m <sup>3</sup> /s)                                                              | RES_RR     | 479.3333    | 599.1111  | 393.7778   | 702.0000   |

**Table S3 Average monthly water use by area**

| Area   | QH     | GS      | NX      | NMG     | SX      | SHX     | HN      | description                                                                                                                          |
|--------|--------|---------|---------|---------|---------|---------|---------|--------------------------------------------------------------------------------------------------------------------------------------|
| WURCH1 | 101.57 | 116.12  | 0.00    | 118.83  | 743.01  | 370.65  | 518.61  | Surface water intake<br>Average daily water<br>quantity taken from<br>rivers in this month.<br>(10 <sup>4</sup> m <sup>3</sup> /day) |
| WURCH2 | 137.26 | 125.08  | 8.96    | 107.57  | 506.18  | 913.78  | 1038.09 |                                                                                                                                      |
| WURCH3 | 157.38 | 702.54  | 66.39   | 88.67   | 833.55  | 1586.40 | 2226.65 |                                                                                                                                      |
| WURCH4 | 212.20 | 888.42  | 971.80  | 1485.50 | 1008.60 | 1058.95 | 1539.90 |                                                                                                                                      |
| WURCH5 | 350.15 | 1533.78 | 1936.52 | 3761.61 | 1029.33 | 251.33  | 1644.44 |                                                                                                                                      |
| WURCH6 | 441.60 | 1530.88 | 2935.03 | 2284.47 | 1173.39 | 1621.99 | 2213.88 |                                                                                                                                      |
| WURCH7 | 492.71 | 1310.33 | 2520.75 | 3109.17 | 858.58  | 1704.96 | 1957.60 |                                                                                                                                      |

|          |        |         |         |         |        |         |         |
|----------|--------|---------|---------|---------|--------|---------|---------|
| WURCH8   | 378.89 | 997.91  | 2086.06 | 1342.63 | 643.99 | 1164.04 | 1511.87 |
| WURCH9   | 224.39 | 624.68  | 133.15  | 617.53  | 548.06 | 300.71  | 942.18  |
| WURCH10  | 192.80 | 764.34  | 112.68  | 4326.69 | 473.15 | 74.07   | 807.98  |
| WURCH11  | 257.89 | 1098.34 | 1699.33 | 1473.35 | 863.00 | 595.66  | 650.20  |
| WURCH12  | 153.90 | 105.74  | 8.09    | 64.09   | 896.96 | 341.12  | 590.88  |
| WUSHAL1  | 18.52  | 14.14   | 0.00    | 40.92   | 406.69 | 253.06  | 177.30  |
| WUSHAL2  | 24.58  | 15.20   | 0.87    | 37.61   | 270.74 | 640.57  | 355.29  |
| WUSHAL3  | 28.01  | 84.83   | 6.44    | 32.78   | 442.76 | 1112.95 | 761.74  |
| WUSHAL4  | 37.38  | 107.61  | 100.06  | 525.70  | 542.37 | 744.01  | 526.41  |
| WUSHAL5  | 63.27  | 185.92  | 196.85  | 1342.67 | 565.93 | 178.93  | 558.65  |
| WUSHAL6  | 79.75  | 185.76  | 299.66  | 780.67  | 642.42 | 1137.33 | 754.88  |
| WUSHAL7  | 87.92  | 158.86  | 259.06  | 1116.42 | 470.75 | 1200.29 | 671.72  |
| WUSHAL8  | 69.84  | 120.96  | 215.07  | 475.42  | 344.70 | 814.50  | 514.02  |
| WUSHAL9  | 42.02  | 76.07   | 14.26   | 216.54  | 288.27 | 219.71  | 319.54  |
| WUSHAL10 | 34.92  | 92.82   | 12.77   | 1550.17 | 260.39 | 53.55   | 274.96  |
| WUSHAL11 | 48.38  | 131.25  | 174.54  | 526.76  | 464.45 | 420.88  | 215.79  |
| WUSHAL12 | 28.50  | 12.73   | 0.78    | 22.47   | 494.88 | 250.63  | 195.75  |

Groundwater intake  
Average daily water  
quantity taken from  
shallow aquifer in this  
month (10<sup>4</sup>m<sup>3</sup>/day)

Table S4 Parameters for calibration

| Parameters | Description                                                                    | Value         | Range     |
|------------|--------------------------------------------------------------------------------|---------------|-----------|
| CN2        | SCS runoff curve number                                                        | Multiply by   | -0.5-0.5  |
| SOL_AWC    | Effective soil water storage capacity                                          | Multiply by   | -0.5-0.5  |
| SOL_K      | Saturated hydraulic conductivity of soil                                       | Replace value | -0.5-0.5  |
| ESCO       | Soil evaporation compensation factor                                           | Replace value | 0-1       |
| GWQMN      | Threshold value of shallow aquifer water level                                 | Replace value | 0-5000    |
| REVAPMN    | Shallow groundwater seepage threshold                                          | Replace value | 0-500     |
| CH_K2      | Effective hydraulic conductivity coefficient of alluvial layer in main channel | Replace value | -0.01-500 |
| ALPHA_BF   | $\alpha$ coefficient of base flow                                              | Replace value | 0-1       |
| GW_DELAY   | Time delay of groundwater /d                                                   | Replace value | 0-500     |
| HRU_SLP    | Average grade                                                                  | Replace value | 0-1       |

Table S5 Decision variables

| Area      |                                              | Qinghai | Gansu | Ningxia | Neimenggu | Shanxi | Shannxi | Henan | Shandong |
|-----------|----------------------------------------------|---------|-------|---------|-----------|--------|---------|-------|----------|
| Qinghai   |                                              | \       | \     | \       | \         | \      | \       | \     | \        |
| Gansu     | $X1(TWRA_{QHtoGS})$<br>$X2(TWRI_{QHtoGS})$   |         | \     | \       | \         | \      | \       | \     | \        |
| Ningxia   | $X3(TWRA_{QHtoNX})$<br>$X4(TWRI_{QHtoNX})$   |         | ..... | \       | \         | \      | \       | \     | \        |
| Neimenggu | $X5(TWRA_{QHtoNMG})$<br>$X6(TWRI_{QHtoNMG})$ |         | ..... | .....   | \         | \      | \       | \     | \        |
| Shanxi    | $X7(TWRA_{QHtoSX})$<br>$X8(TWRI_{QHtoSX})$   |         | ..... | .....   | .....     | \      | \       | \     | \        |

|                  |                                                    |              |                |                  |               |                |                                                  |                 |
|------------------|----------------------------------------------------|--------------|----------------|------------------|---------------|----------------|--------------------------------------------------|-----------------|
| <b>Shannxi</b>   | $X9(TWRA_{QHtoSHX})$<br>$X10(TWRI_{QHtoSHX})$      | .....        | .....          | .....            | .....         | \              | \                                                | \               |
| <b>Henan</b>     | $X11(TWRA_{QHtoHN})$<br>$X12(TWRI_{QHtoHN})$       | .....        | .....          | .....            | .....         | .....          | \                                                | \               |
| <b>Shandong</b>  | $X13(TWRA_{QHtoSD})$<br>$X14(TWRI_{QHtoSD})$       | .....        | .....          | .....            | .....         | .....          | $X55(TWRA_{HNtoSD})$<br>$X56(TWRI_{HNtoSD})$     | \               |
| <b>Area</b>      | <b>Qinghai</b>                                     | <b>Gansu</b> | <b>Ningxia</b> | <b>Neimenggu</b> | <b>Shanxi</b> | <b>Shannxi</b> | <b>Henan</b>                                     | <b>Shandong</b> |
| <b>Qinghai</b>   | \                                                  | \            | \              | \                | \             | \              | \                                                | \               |
| <b>Gansu</b>     | $X57(TPRCOD_{QHtoGS})$<br>$X58(TPRNH4_{QHtoGS})$   | \            | \              | \                | \             | \              | \                                                | \               |
| <b>Ningxia</b>   | $X59(TPRCOD_{QHtoNX})$<br>$X60(TPRNH4_{QHtoNX})$   | .....        | \              | \                | \             | \              | \                                                | \               |
| <b>Neimenggu</b> | $X61(TPRCOD_{QHtoNMG})$<br>$X62(TPRNH4_{QHtoNMG})$ | .....        | .....          | \                | \             | \              | \                                                | \               |
| <b>Shanxi</b>    | $X63(TPRCOD_{QHtoSX})$<br>$X64(TPRNH4_{QHtoSX})$   | .....        | .....          | .....            | \             | \              | \                                                | \               |
| <b>Shannxi</b>   | $X65(TPRCOD_{QHtoSHX})$<br>$X66(TPRNH4_{QHtoSHX})$ | .....        | .....          | .....            | .....         | \              | \                                                | \               |
| <b>Henan</b>     | $X67(TPRCOD_{QHtoHN})$<br>$X68(TPRNH4_{QHtoHN})$   | .....        | .....          | .....            | .....         | .....          | \                                                | \               |
| <b>Shandong</b>  | $X69(TPRCOD_{QHtoSD})$<br>$X70(TPRNH4_{QHtoSD})$   | .....        | .....          | .....            | .....         | .....          | $X55(TPRCOD_{HNtoSD})$<br>$X56(TPRNH4_{HNtoSD})$ | \               |

**Table S6 The average monthly discharge of reservoirs from 2015 to 2019(m³/s)**

| Reservoirs | Longyangxia | Liujiaxia | Wanjiazhai | Xiaolangdi | Sanmenxia |
|------------|-------------|-----------|------------|------------|-----------|
| 201501     | 450         | 400       | 300        | 450        | 350       |
| 201502     | 450         | 300       | 350        | 550        | 450       |
| 201503     | 450         | 400       | 650        | 850        | 400       |
| 201504     | 450         | 500       | 250        | 800        | 500       |
| 201505     | 450         | 750       | 100        | 880        | 300       |
| 201506     | 450         | 700       | 200        | 850        | 300       |
| 201507     | 500         | 750       | 700        | 950        | 600       |
| 201508     | 450         | 700       | 450        | 400        | 500       |
| 201509     | 400         | 550       | 350        | 300        | 500       |
| 201510     | 400         | 500       | 300        | 300        | 400       |
| 201511     | 400         | 500       | 300        | 250        | 300       |
| 201512     | 400         | 300       | 300        | 250        | 350       |
| 201601     | 400         | 300       | 250        | 300        | 250       |
| 201602     | 400         | 300       | 300        | 450        | 250       |
| 201603     | 400         | 300       | 450        | 650        | 350       |
| 201604     | 400         | 450       | 200        | 600        | 200       |
| 201605     | 400         | 550       | 200        | 450        | 150       |
| 201606     | 400         | 700       | 250        | 300        | 200       |
| 201607     | 500         | 750       | 350        | 700        | 600       |
| 201608     | 450         | 750       | 350        | 600        | 400       |

---

|        |     |      |     |      |      |
|--------|-----|------|-----|------|------|
| 201609 | 300 | 500  | 200 | 600  | 450  |
| 201610 | 300 | 500  | 200 | 500  | 300  |
| 201611 | 250 | 450  | 200 | 300  | 300  |
| 201612 | 250 | 300  | 200 | 200  | 300  |
| 201701 | 300 | 250  | 150 | 200  | 250  |
| 201702 | 300 | 250  | 300 | 350  | 300  |
| 201703 | 300 | 250  | 300 | 650  | 350  |
| 201704 | 350 | 450  | 300 | 550  | 350  |
| 201705 | 400 | 650  | 300 | 650  | 250  |
| 201706 | 400 | 600  | 400 | 600  | 300  |
| 201707 | 450 | 700  | 450 | 400  | 600  |
| 201708 | 450 | 700  | 350 | 400  | 600  |
| 201709 | 350 | 600  | 300 | 300  | 550  |
| 201710 | 350 | 600  | 300 | 300  | 550  |
| 201711 | 350 | 650  | 300 | 400  | 500  |
| 201712 | 400 | 300  | 400 | 400  | 350  |
| 201801 | 400 | 300  | 250 | 300  | 300  |
| 201802 | 400 | 300  | 300 | 400  | 400  |
| 201803 | 400 | 350  | 450 | 800  | 450  |
| 201804 | 500 | 600  | 350 | 1000 | 400  |
| 201805 | 550 | 850  | 150 | 950  | 500  |
| 201806 | 792 | 1000 | 400 | 1500 | 600  |
| 201807 | 750 | 1200 | 700 | 1500 | 1400 |
| 201808 | 650 | 1200 | 700 | 1500 | 1400 |
| 201809 | 600 | 750  | 600 | 1500 | 1600 |
| 201810 | 600 | 650  | 600 | 1200 | 1400 |
| 201811 | 650 | 660  | 500 | 650  | 750  |
| 201812 | 400 | 450  | 400 | 450  | 400  |
| 201901 | 400 | 350  | 300 | 350  | 460  |
| 201902 | 300 | 350  | 450 | 650  | 500  |
| 201903 | 450 | 450  | 550 | 850  | 550  |
| 201904 | 800 | 950  | 600 | 1200 | 700  |
| 201905 | 850 | 1000 | 450 | 1200 | 700  |
| 201906 | 875 | 1200 | 700 | 1500 | 800  |
| 201907 | 850 | 1200 | 850 | 2000 | 1200 |
| 201908 | 750 | 1200 | 850 | 950  | 1200 |
| 201909 | 700 | 750  | 700 | 1600 | 1200 |
| 201910 | 700 | 750  | 700 | 1200 | 1000 |
| 201911 | 700 | 700  | 500 | 700  | 750  |
| 201912 | 500 | 450  | 300 | 400  | 550  |
